## Correspondence

# Comments on ‘Association of $Fc\epsilon RI\beta$ polymorphisms with risk of asthma and allergic rhinitis: evidence based on 29 case–control studies’

 Haijun Yang<sup>1,\*</sup>, Lan Zheng<sup>2,3,\*</sup>, Yanmei Zhang<sup>1</sup>, Min Yang<sup>1</sup> and Sha Wei<sup>1</sup>

<sup>1</sup>Department of Preventive Medicine, College of Basic Medical Sciences, Hubei University of Chinese Medicine, Hongshan District, Wuhan 430065, P.R. China; <sup>2</sup>Department of Internal Medicine, the First School of Clinical Medicine, Hubei University of Chinese Medicine, Wuchang District, Wuhan 430060, P.R. China; <sup>3</sup>Section of Respiratory Medicine, Department of Internal Medicine, Hubei Provincial Hospital of Traditional Chinese Medicine, Wuchang District, Wuhan 430061, P.R. China

**Correspondence:** Haijun Yang ([haijyang@hbtcm.edu.cn](mailto:haijyang@hbtcm.edu.cn))

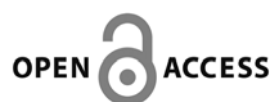

Guo *et al.* (*Bioscience Reports* (2018) **38**, BSR20180177) published a meta-analysis concerning the association between five single nucleotide polymorphisms (SNPs) in the high-affinity IgE receptor  $\beta$  chain ( $Fc\epsilon RI\beta$ ) gene, namely E237G, -109 C/T, RsaI.in2, RsaI.ex7, and I181L, and risk of asthma and allergic rhinitis based on available 29 case–control studies. Summary odds ratios (ORs) and 95% confidence intervals (CIs) were used to assess the strength of association of SNPs in  $Fc\epsilon RI\beta$  gene with allergic diseases risk. They found that  $Fc\epsilon RI\beta$  E237G (237G vs. 237E: OR = 1.28, 95% CI = 1.06–1.53) and -109 C/T (TT vs. CT+CC: OR = 1.58, 95% CI = 1.26–1.98) were risk factors for allergic diseases. Guo *et al.*'s findings are interesting, but we found that several issues should be clarified after carefully reading the paper. Here, we intended to comment on these data clarifications.

Dear editor,

We researched the relevant studies about the association between the high-affinity IgE receptor  $\beta$  chain ( $Fc\epsilon RI\beta$ ) polymorphisms and allergic diseases risk in Medline, Embase, Web of Science, Chinese National Knowledge Infrastructure, and Wanfang databases. No limit of start year and month was set, and the updated time was August 2019. The terms, search strategies, and inclusion/exclusion criteria were the same as reported by Guo *et al.* [1]. Comparing our retrieved studies with the ones in Table 1 of Guo *et al.*'s paper [1], it seems that some errors or mistakes should be corrected.

First, several relevant studies that met the inclusion criteria were missed in Guo *et al.*'s paper [2–15]. Of the 14 missed studies, 5 articles were published before January 2000 [2–6], which was the start time of published paper restricted in Guo *et al.*'s literature searching strategy [1]; 3 reports were from Japan [2,6,11], 4 studies were from China [9,13–15], 1 each was from South Africa [3], Switzerland [4], Australia [5], India [7], South Korea [8], the U.S.A. [11], and Hungary [12], respectively. In Green *et al.*'s study, black and white populations were recruited, respectively [3]. In Undarmaa *et al.*'s report, children and adult populations were collected, respectively [10].

Second, several studies published by the same research group were included in Guo *et al.*'s report [1]. According to the inclusion and exclusion criteria, when more than two studies were reported by the same research group, only the paper with the largest sample size was included in the analysis. We think Cui *et al.*'s study [16], published in 2004, with 106 adult asthmatics and 106 controls, were incorporated into their another paper, published in 2003, with 216 (number including adults and children) cases and 198 controls [17]. Similarly, the study populations in Hua *et al.*'s papers [18,19] and the Chinese Han case/control populations in Ramphul *et al.*'s article [20], were recruited by the same research group, the two smaller sample-size studies should be excluded from the analysis [18,20].

\*These authors contributed equally to this work.

Received: 23 October 2019

Revised: 03 July 2020

Accepted: 07 July 2020

Accepted Manuscript online:  
08 July 2020

Version of Record published:  
21 July 2020

**Table 1** Main characteristics of eligible studies

| Author                         | Year | Country      | Ethnicity | Atopy              | Sample size (n) |         | Genotype frequency (n) |     |    |         |     |    | HWE (P) |
|--------------------------------|------|--------------|-----------|--------------------|-----------------|---------|------------------------|-----|----|---------|-----|----|---------|
|                                |      |              |           |                    |                 |         | Case                   |     |    | Control |     |    |         |
|                                |      |              |           |                    | Case            | Control | EE                     | EG  | GG | EE      | EG  | GG |         |
| FcεRIβ gene E237G polymorphism |      |              |           |                    |                 |         |                        |     |    |         |     |    |         |
| Shirakawa                      | 1996 | Japan        | Asian     | asthma             | 300             | 100     | 256                    | 44  | 0  | 94      | 6   | 0  | 1.000   |
| Green                          | 1998 | South Africa | African   | asthma             | 41              | 42      | 27                     | 12  | 2  | 25      | 17  | 0  | 0.172   |
| Green                          | 1998 | South Africa | Caucasian | asthma             | 46              | 51      | 35                     | 11  | 0  | 47      | 4   | 0  | 1.000   |
| Rohrbach                       | 1998 | Switzerland  | Caucasian | asthma             | 224             | 159     | 207                    | 17  | 0  | 151     | 8   | 0  | 1.000   |
| Ishizawa                       | 1999 | Japan        | Asian     | asthma             | 90              | 102     | 70                     | 19  | 1  | 81      | 21  | 0  | 0.593   |
| Chen                           | 2000 | China        | Asian     | asthma             | 101             | 47      | 59                     | 39  | 3  | 30      | 16  | 1  | 1.000   |
| Soriano                        | 2000 | Spain        | Caucasian | asthma             | 145             | 47      | 134                    | 11  | 0  | 43      | 4   | 0  | 1.000   |
| Takabayashi                    | 2000 | Japan        | Asian     | asthma             | 100             | 100     | 69                     | 27  | 4  | 65      | 33  | 2  | 1.000   |
| Nagata                         | 2001 | Japan        | Asian     | rhinitis           | 233             | 100     | 150                    | 76  | 7  | 77      | 18  | 5  | 0.021   |
| Zeng                           | 2001 | China        | Asian     | asthma             | 69              | 28      | 61                     | 5   | 3  | 27      | 1   | 0  | 1.000   |
| Cui                            | 2003 | China        | Asian     | asthma             | 216             | 198     | 125                    | 80  | 11 | 148     | 46  | 4  | 0.766   |
| Korzycka                       | 2004 | Poland       | Caucasian | asthma<br>rhinitis | 98              | 87      | 92                     | 6   | 0  | 83      | 4   | 0  | 1.000   |
| Rigoli                         | 2004 | Italy        | Caucasian | asthma<br>rhinitis | 100             | 103     | 79                     | 16  | 5  | 102     | 1   | 0  | 1.000   |
| Sharma                         | 2004 | India        | Asian     | asthma             | 329             | 266     | 300                    | 29  | 0  | 250     | 16  | 0  | 1.000   |
| Zhang (Chinese)                | 2004 | Singapore    | Asian     | asthma             | 141             | 157     | 81                     | 57  | 3  | 108     | 42  | 7  | 1.194   |
| Zhang (Indian)                 | 2004 | Singapore    | Asian     | asthma             | 82              | 98      | 71                     | 10  | 1  | 80      | 18  | 0  | 1.000   |
| Zhang (Malay)                  | 2004 | Singapore    | Asian     | asthma             | 68              | 100     | 49                     | 19  | 0  | 77      | 23  | 0  | 0.353   |
| Zhao                           | 2004 | China        | Asian     | asthma             | 151             | 105     | 126                    | 23  | 2  | 92      | 13  | 0  | 1.000   |
| Kim                            | 2006 | Korea        | Asian     | asthma             | 307             | 264     | 235                    | 64  | 8  | 177     | 81  | 6  | 0.353   |
| Li                             | 2006 | China        | Asian     | asthma             | 50              | 40      | 43                     | 7   | 0  | 40      | 0   | 0  | 1.000   |
| Liu                            | 2006 | China        | Asian     | asthma             | 60              | 50      | 45                     | 14  | 1  | 39      | 10  | 1  | 0.527   |
| Kim                            | 2009 | Korea        | Asian     | asthma             | 347             | 303     | 244                    | 99  | 4  | 217     | 81  | 5  | 0.409   |
| Wang                           | 2009 | China        | Asian     | asthma             | 446             | 506     | 309                    | 121 | 16 | 314     | 165 | 27 | 0.386   |
| Undarmaa                       | 2010 | Japan        | Asian     | asthma             | 367             | 630     | 256                    | 102 | 9  | 440     | 165 | 25 | 0.061   |
| Undarmaa                       | 2010 | Japan        | Asian     | asthma             | 322             | 336     | 243                    | 70  | 9  | 242     | 85  | 9  | 0.642   |
| Murk                           | 2011 | U.S.A.       | mixed     | asthma             | 100             | 486     | 91                     | 9   | 0  | 452     | 33  | 1  | 0.470   |
| Dmitrieva                      | 2012 | Russia       | Caucasian | asthma             | 224             | 172     | 217                    | 7   | 0  | 170     | 2   | 0  | 1.000   |
| Ungvari                        | 2012 | Hungary      | Caucasian | asthma             | 436             | 765     | 418                    | 17  | 1  | 723     | 38  | 4  | 0.004   |
| Zheng                          | 2012 | China        | Asian     | asthma             | 198             | 110     | 126                    | 61  | 11 | 76      | 29  | 5  | 0.325   |
| Chen                           | 2014 | China        | Asian     | asthma             | 46              | 52      | 38                     | 6   | 2  | 38      | 6   | 8  | <0.001  |
| Wan                            | 2014 | China        | Asian     | asthma             | 58              | 50      | 41                     | 16  | 1  | 47      | 3   | 0  | 1.000   |
| Ramphul                        | 2014 | India        | Asian     | asthma             | 192             | 188     | 170                    | 21  | 1  | 163     | 24  | 1  | 0.605   |
| Amo                            | 2016 | Spain        | Caucasian | rhinitis           | 366             | 526     | 330                    | 36  | 0  | 487     | 39  | 0  | 1.000   |
| Amo                            | 2016 | Spain        | Caucasian | asthma<br>rhinitis | 149             | 526     | 146                    | 3   | 0  | 487     | 39  | 0  | 1.000   |
| Hua                            | 2016 | China        | Asian     | asthma             | 1000            | 1000    | 659                    | 276 | 65 | 688     | 289 | 23 | 0.252   |
| Yang                           | 2017 | China        | Asian     | asthma             | 74              | 110     | 38                     | 31  | 5  | 77      | 30  | 3  | 1.000   |

| Author                          | Year | Country   | Ethnicity | Atopy  | Sample size (n) |         | Genotype frequency (n) |     |     |         |     |     | HWE (P) |
|---------------------------------|------|-----------|-----------|--------|-----------------|---------|------------------------|-----|-----|---------|-----|-----|---------|
|                                 |      |           |           |        |                 |         | Case                   |     |     | control |     |     |         |
|                                 |      |           |           |        | case            | control | CC                     | CT  | TT  | CC      | CT  | TT  |         |
| FcεRIβ gene C-109T polymorphism |      |           |           |        |                 |         |                        |     |     |         |     |     |         |
| Dickson                         | 1999 | Australia | Caucasian | asthma | 44              | 26      | 11                     | 17  | 16  | 6       | 15  | 5   | 0.428   |
| Cui                             | 2003 | China     | Asian     | asthma | 216             | 198     | 23                     | 106 | 87  | 19      | 103 | 76  | 0.059   |
| Gan                             | 2004 | China     | Asian     | asthma | 45              | 45      | 10                     | 12  | 23  | 12      | 14  | 19  | 0.015   |
| Zhao                            | 2004 | China     | Asian     | asthma | 126             | 87      | 11                     | 69  | 46  | 9       | 38  | 40  | 0.996   |
| Hizawa                          | 2006 | Japan     | Asian     | asthma | 374             | 374     | 39                     | 178 | 157 | 49      | 169 | 156 | 0.762   |

Continued over

**Table 1** Main characteristics of eligible studies (Continued)

| Author    | Year | Country | Ethnicity | Atopy           | Sample size (n) |         | Genotype frequency (n) |     |     |         |     |     | HWE (P) |
|-----------|------|---------|-----------|-----------------|-----------------|---------|------------------------|-----|-----|---------|-----|-----|---------|
|           |      |         |           |                 |                 |         | Case                   |     |     | control |     |     |         |
|           |      |         |           |                 | case            | control | CC                     | CT  | TT  | CC      | CT  | TT  |         |
| Kim       | 2006 | Korea   | Asian     | asthma          | 302             | 264     | 17                     | 139 | 146 | 23      | 128 | 113 | 0.114   |
| Potaczek  | 2007 | Poland  | Caucasian | asthma          | 154             | 154     | 25                     | 72  | 57  | 27      | 70  | 57  | 0.495   |
| Kim       | 2009 | Korea   | Asian     | asthma          | 346             | 303     | 20                     | 167 | 159 | 28      | 135 | 140 | 0.576   |
| Sharma    | 2009 | India   | Asian     | asthma          | 237             | 221     | 89                     | 108 | 40  | 34      | 118 | 69  | 0.156   |
| Tikhonova | 2010 | Russia  | Caucasian | asthma          | 140             | 136     | 18                     | 69  | 53  | 18      | 70  | 48  | 0.339   |
| Ramphul   | 2014 | India   | Asian     | asthma          | 189             | 188     | 55                     | 99  | 35  | 66      | 87  | 35  | 0.505   |
| Wan       | 2014 | China   | Asian     | asthma          | 58              | 50      | 2                      | 25  | 31  | 1       | 16  | 33  | 1.000   |
| Amo       | 2016 | Spain   | Caucasian | asthma rhinitis | 366             | 526     | 78                     | 188 | 100 | 105     | 277 | 144 | 0.176   |
| Amo       | 2016 | Spain   | Caucasian | rhinitis        | 149             | 526     | 35                     | 67  | 47  | 105     | 277 | 144 | 0.176   |
| Hua       | 2016 | China   | Asian     | asthma          | 1000            | 1000    | 148                    | 436 | 416 | 124     | 470 | 406 | 0.502   |

Abbreviation: HWE, Hardy–Weinberg equilibrium.

**Table 2** Summary ORs for the association between *FcεRIβ* C-109T polymorphism and allergic diseases risk

| Comparisons                                 | Sample size | Number of studies | Hypothesis tests    |          |          | Heterogeneity tests |          |                           | Publication bias test ( <i>P</i> ) |              |
|---------------------------------------------|-------------|-------------------|---------------------|----------|----------|---------------------|----------|---------------------------|------------------------------------|--------------|
|                                             |             |                   | OR (95% CI)         | <i>z</i> | <i>P</i> | χ <sup>2</sup> (df) | <i>P</i> | <i>I</i> <sup>2</sup> (%) | Begg's test                        | Egger's test |
| Overall                                     |             |                   |                     |          |          |                     |          |                           |                                    |              |
| C vs. T                                     | 7492/7144   | 14                | 1.024 (0.900–1.164) | 0.36     | 0.722    | 37.83 (13)          | <0.001   | 65.6                      | 0.784                              | 0.958        |
| CC vs. TT                                   | 1994/1862   | 14                | 1.007 (0.759–1.335) | 0.05     | 0.963    | 36.77 (13)          | <0.001   | 64.6                      | 0.870                              | 0.582        |
| CC vs. CT                                   | 2333/2231   | 14                | 1.028 (0.807–1.311) | 0.22     | 0.823    | 30.59 (13)          | 0.004    | 57.5                      | 0.702                              | 0.419        |
| CT vs. TT                                   | 3165/3051   | 14                | 0.984 (0.890–1.089) | 0.31     | 0.758    | 14.33 (13)          | 0.351    | 9.3                       | 0.547                              | 0.538        |
| CC+CT vs. TT                                | 3746/3572   | 14                | 1.001 (0.909–1.102) | 0.01     | 0.989    | 21.72 (13)          | 0.060    | 40.1                      | 0.784                              | 0.670        |
| CC vs. CT+TT                                | 3746/3572   | 14                | 1.015 (0.788–1.307) | 0.11     | 0.911    | 37.20 (13)          | <0.001   | 65.1                      | 0.956                              | 0.446        |
| Stratification by ethnicity                 |             |                   |                     |          |          |                     |          |                           |                                    |              |
| Asians                                      |             |                   |                     |          |          |                     |          |                           |                                    |              |
| C vs. T                                     | 5786/5460   | 10                | 1.052 (0.883–1.254) | 0.57     | 0.567    | 36.51 (9)           | <0.001   | 75.3                      | 0.655                              | 0.802        |
| CC+CT vs. TT                                | 2893/2730   | 10                | 1.070 (0.895–1.280) | 0.74     | 0.458    | 18.97 (9)           | 0.025    | 52.6                      | 0.325                              | 0.304        |
| CC vs. CT+TT                                | 2893/2730   | 10                | 0.998 (0.695–1.434) | 0.01     | 0.992    | 36.70 (9)           | <0.001   | 75.5                      | 0.788                              | 0.537        |
| Caucasians                                  |             |                   |                     |          |          |                     |          |                           |                                    |              |
| C vs. T                                     | 1706/1684   | 4                 | 0.984 (0.858–1.127) | 0.24     | 0.813    | 0.89 (3)            | 0.828    | <0.1                      | 0.042                              | 0.036        |
| CC+CT vs. TT                                | 853/842     | 4                 | 0.919 (0.747–1.130) | 0.80     | 0.422    | 1.99 (3)            | 0.576    | <0.1                      | 0.174                              | 0.201        |
| CC vs. CT+TT                                | 853/842     | 4                 | 1.067 (0.836–1.362) | 0.52     | 0.601    | 0.48 (3)            | 0.924    | <0.1                      | 1.000                              | 0.412        |
| Stratification by atopic disease categories |             |                   |                     |          |          |                     |          |                           |                                    |              |
| Asthma                                      |             |                   |                     |          |          |                     |          |                           |                                    |              |
| C vs. T                                     | 6462/6092   | 13                | 1.024 (0.885–1.185) | 0.32     | 0.750    | 37.83 (12)          | <0.001   | 68.3                      | 0.903                              | 0.950        |
| CC+CT vs. TT                                | 3231/3046   | 13                | 1.032 (0.883–1.207) | 0.40     | 0.691    | 21.52 (12)          | 0.043    | 44.2                      | 1.000                              | 0.712        |
| CC vs. CT+TT                                | 3231/3046   | 13                | 0.997 (0.744–1.336) | 0.02     | 0.983    | 37.13 (12)          | <0.001   | 67.7                      | 0.542                              | 0.472        |
| Stratification by HWE                       |             |                   |                     |          |          |                     |          |                           |                                    |              |
| C vs. T                                     | 7402/7054   | 13                | 1.035 (0.907–1.180) | 0.51     | 0.613    | 36.83 (12)          | <0.001   | 67.4                      | 1.000                              | 0.861        |
| CC+CT vs. TT                                | 3701/3527   | 13                | 1.006 (0.913–1.108) | 0.11     | 0.911    | 21.00 (12)          | 0.050    | 42.9                      | 0.272                              | 0.483        |
| CC vs. CT+TT                                | 3701/3527   | 13                | 1.026 (0.789–1.335) | 0.19     | 0.848    | 36.76 (12)          | <0.001   | 67.4                      | 0.807                              | 0.516        |

Abbreviation: df, degree of freedom.

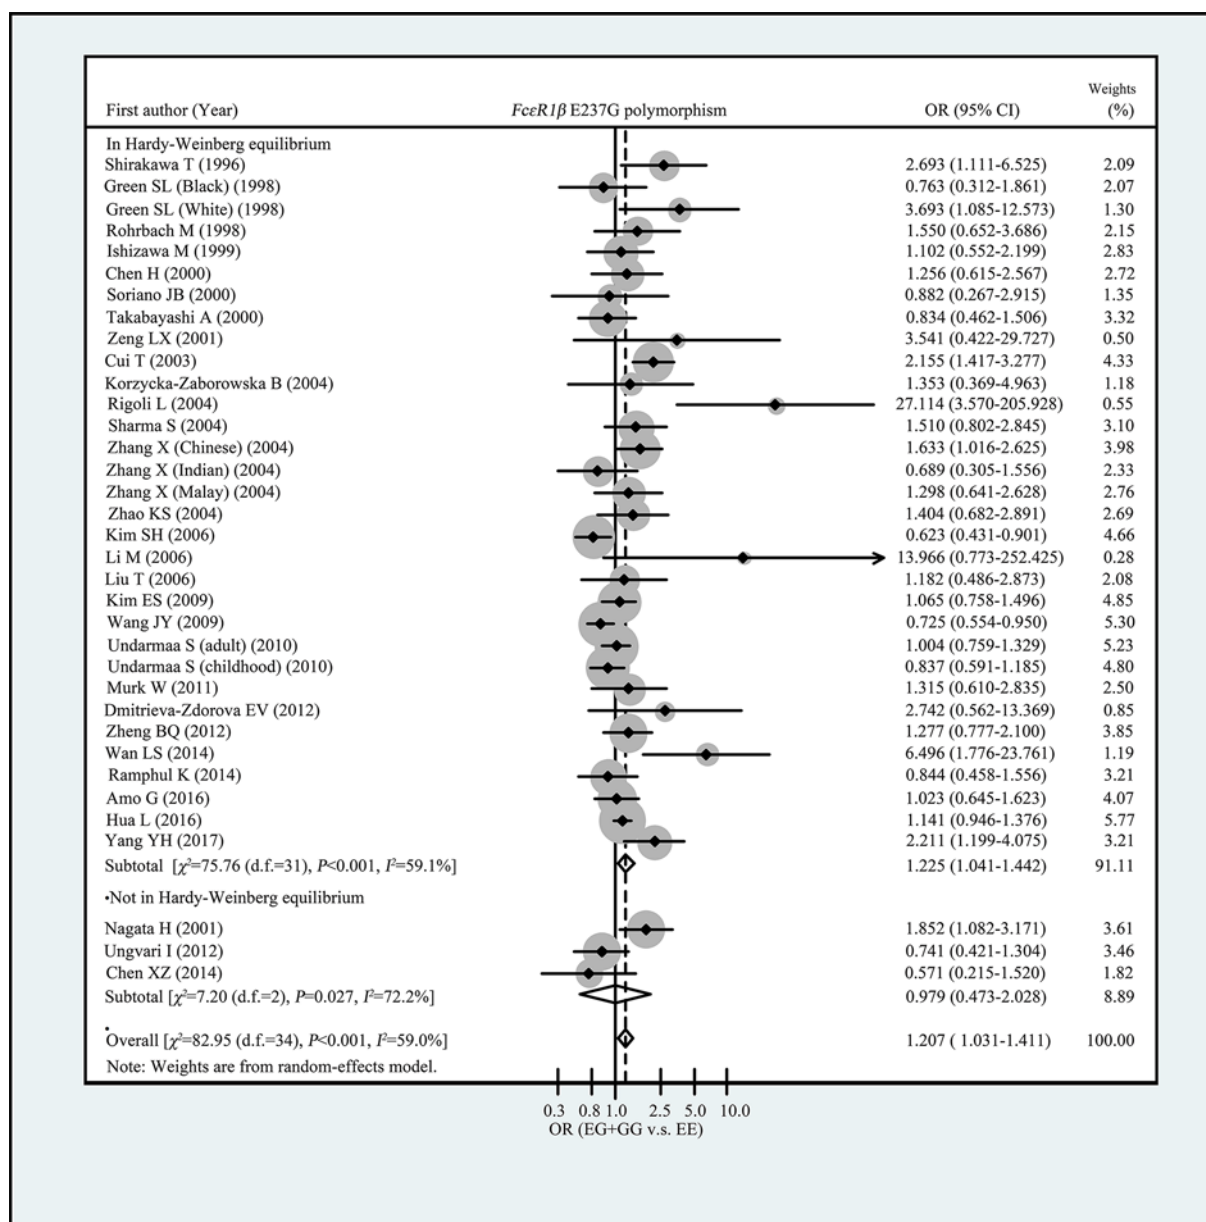

**Figure 1.** Forest plots for the association of *FcεRIβ* E237G polymorphism with allergic diseases risk (subgroup analysis by HWE)

Third, one study reported by Laprise *et al.* [21], with atopic/non-atopic contrast groups, not all the subjects in atopic group met with the diagnosis criteria of asthma, should be excluded from the analysis.

Fourth, the reported genotype frequency for the C-109T or E+237G polymorphisms of *FcεRIβ* gene in two studies of Guo *et al.*'s paper [1] were not in agreement with the ones in their original papers [22,23]. In Sharma and Ghosh's study, the CC, CT, and TT genotype frequency for C-109T polymorphism in case/control groups were (89, 108, and 40)/(34, 118, and 69), respectively [22], which were wrongly counted as (87, 113, and 37)/(39, 108, and 74), respectively, in Guo *et al.*'s paper [1]. In Amo *et al.*'s published article, the EE, EG, and GG genotype frequency in control group for E+237G polymorphism were 487, 39, and 0, respectively [23], which were wrongly counted as 144, 277, and 105, respectively [1].

Considering the above-listed mistakes or errors in Guo *et al.*'s published paper, it seems that the findings and conclusions of Guo *et al.*'s study were not entirely reliable [1]. To overcome the limitations, we performed an updated meta-analysis to re-assess the associations of C-109T and E+237G polymorphisms in the *FcεRIβ* gene with allergic

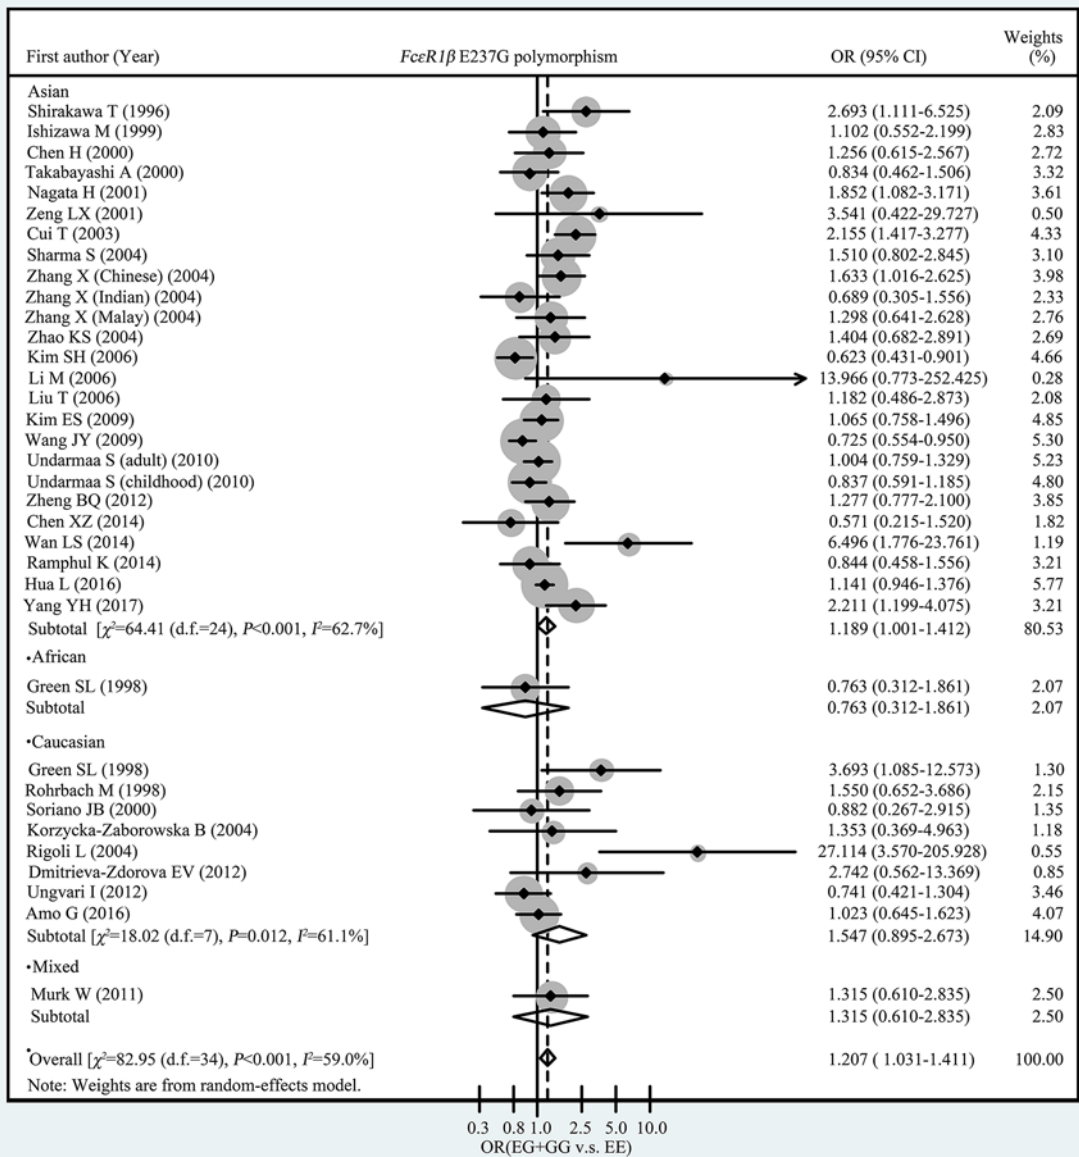

**Figure 2.** Forest plot for the association of FcεRIβ E237G polymorphism with allergic diseases risk (subgroup analysis by ethnicity)

disease (asthma and allergic rhinitis) risk. The statistical analysis methods and software used in this comment were the same as reported by Guo *et al.*, unless otherwise indicated [1].

The main characteristics of the eligible studies [2–17,19,20,22–42], including the first author, publication year, country where individual study was conducted, ethnicity of study population, atopic disease category, sample size of case/control groups, the detailed genotype frequency, and the *P*-values for Hardy–Weinberg Equilibrium (HWE) test, were shown in Table 1. There were 36 case–control studies about the association between E+237G variant and allergic diseases risk [2–4,6–15,17,19,20,23–28,30–33,36,38,39,41,42], and 15 were about the correlation of C-109T polymorphism with allergic diseases risk [5,8,12,14,17,19,22,23,29,34,35,37,38,40]. Of the 15 case–control studies about C-109T polymorphism and allergic disease risk (14 ones according to ethnicity or HWE classification), 10

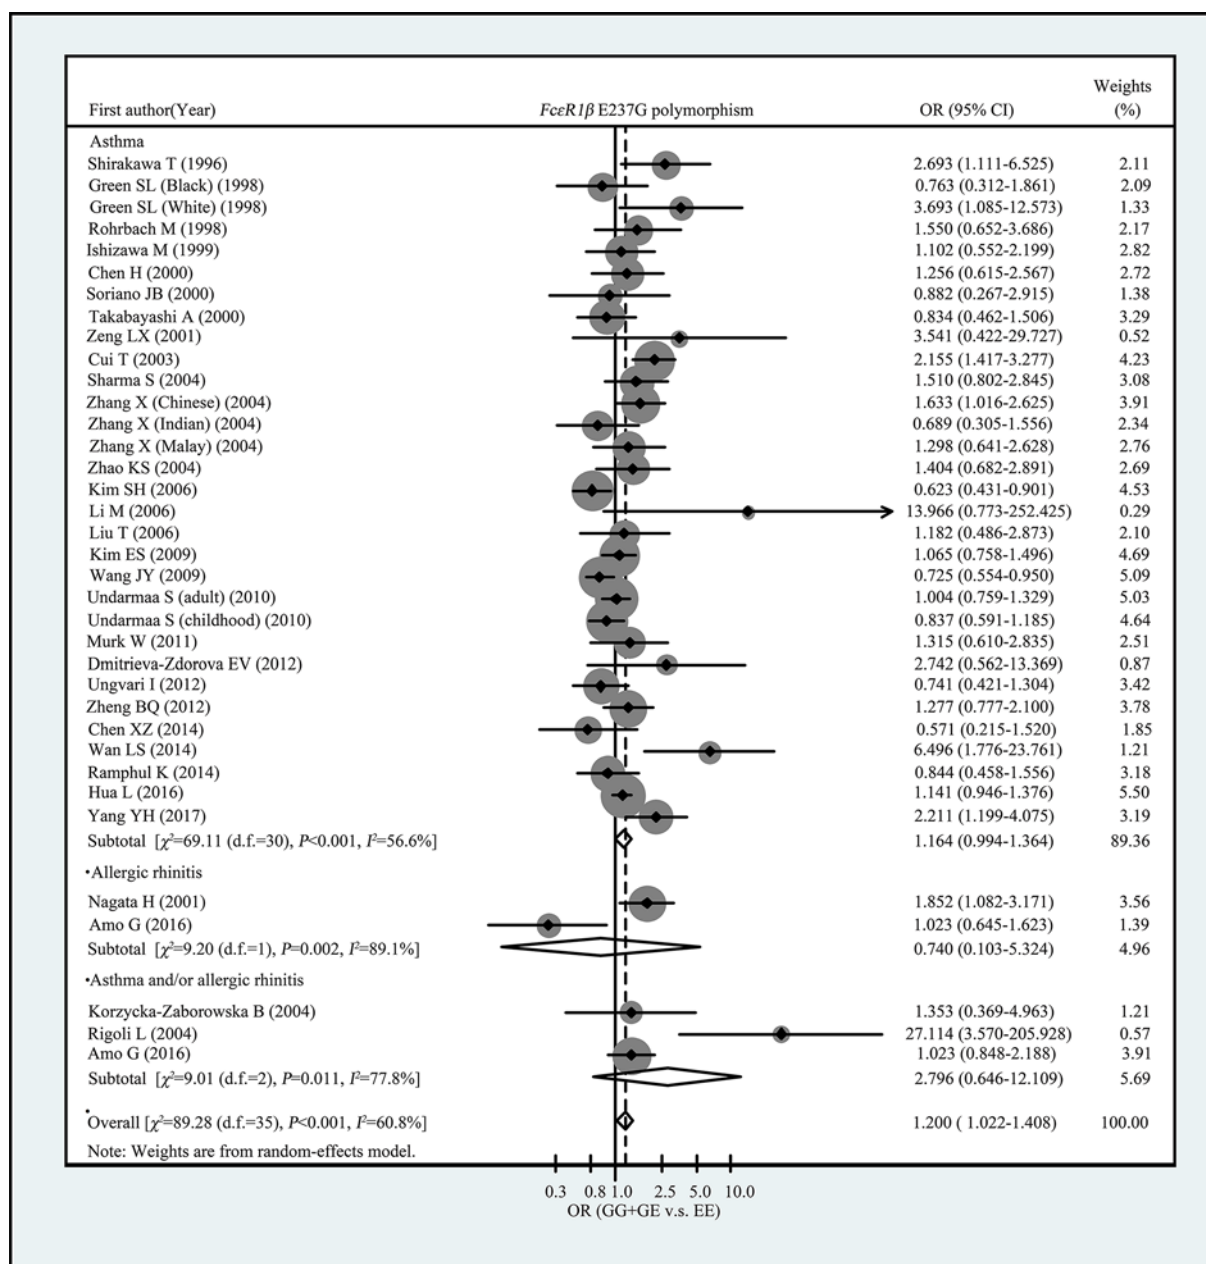

**Figure 3. Forest plot for the association of FcεRIβ E237G polymorphism with allergic diseases risk (subgroup analysis by allergy category)**

were performed in Asians [8,14,17,19,20,22,29,34,35,38] and 4 were conducted in Caucasians [5,23,37,40], respectively; 13 studies were about asthma risk [5,8,17,19,20,22,29,34,37,38,40], 1 was about allergic rhinitis risk [23], and 1 about asthma and rhinitis risk [23], respectively; genotype frequency distribution in control groups of 13 studies were in agreement with HWE [5,8,14,17,19,20,22,23,34,35,37,38,40] and 1 was not [29], respectively. Of the 36 case-control studies about E+237G variant with allergic diseases risk (35 ones according to ethnicity or HWE classification), 25 were carried out in Asians [2,6-10,13-15,17,19,20,24,26-29,32,33,36,38,39,42], 8 were performed in Caucasians [3,4,12,23,25,30,31,41], 1 in Africans [3] and 1 in mixed populations [11], respectively; 31 studies were about asthma risk [2-4,6-15,17,19,20,24-26,28,29,31-33,36,38,39,41,42], 2 were on rhinitis risk [23,27], and 3 were concerned with asthma/rhinitis risk [23,30,31], respectively; genotype frequency distribution in control groups of 32 studies were in line with HWE [2-4,6-11,13-15,17,19,20,23-26,28-33,36,38,39,41,42] and 3 were not [12,13,27], respectively.

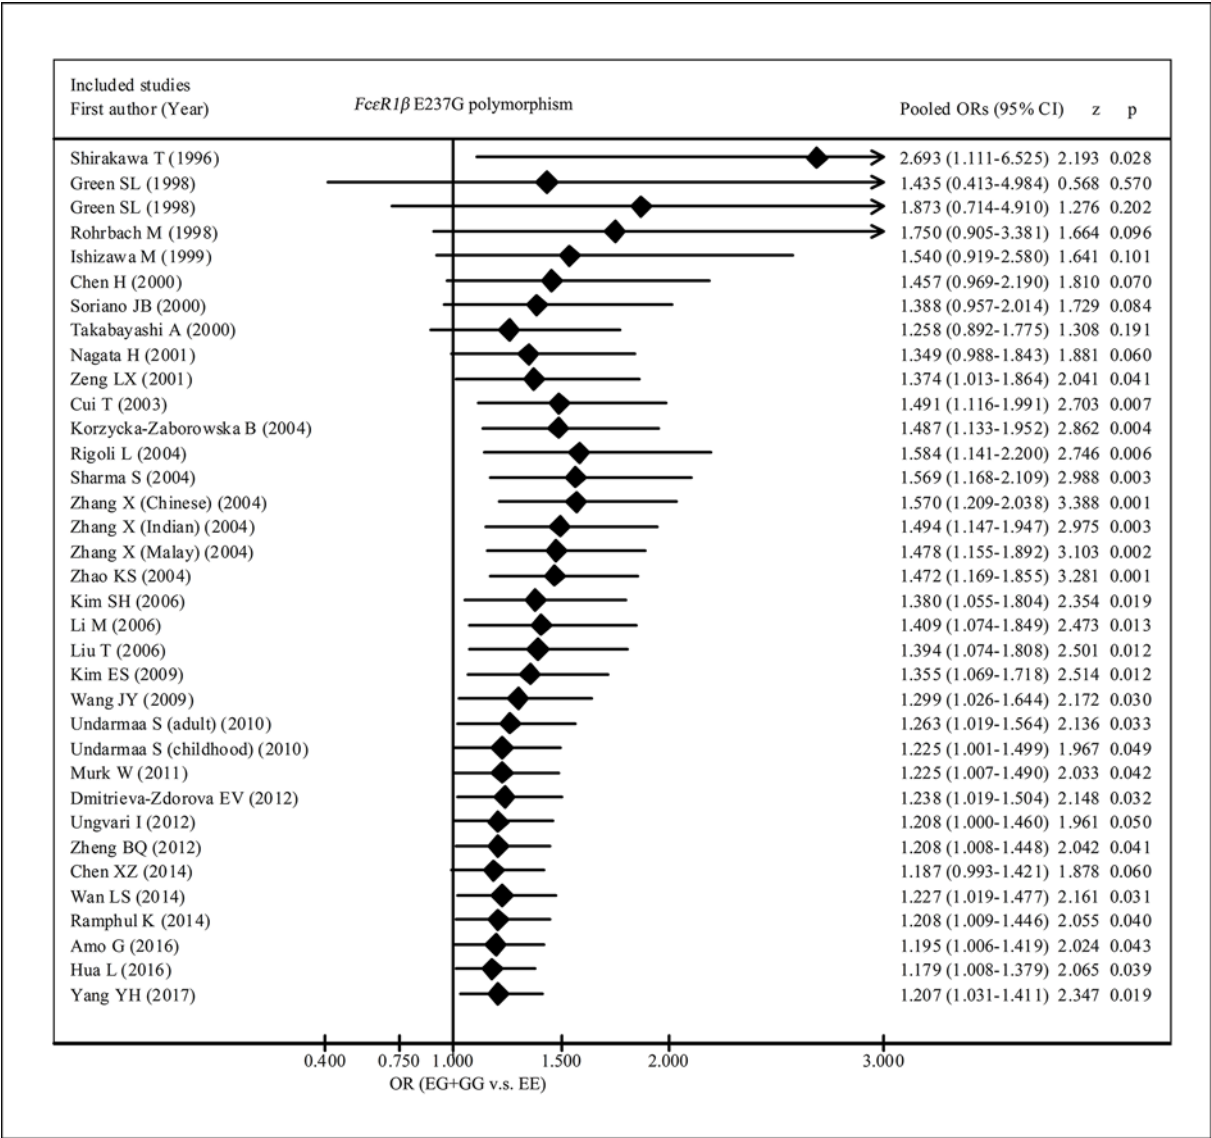

**Figure 4.** Forest plot of cumulative meta-analysis for the association of *FcεRIβ* E237G polymorphism with allergic diseases risk

Table 2 listed the summary odds ratios (ORs) of the association of *FcεRIβ* C-109T polymorphism with allergic diseases risk. Overall, no significant associations between C-109T polymorphism and allergic diseases risk were observed (OR = 1.001, 95% confidence interval (CI): 0.909–1.102 for CC+CT vs. TT and OR = 1.015, 95% CI: 0.788–1.307 for CC vs. CT+TT, respectively). When subgroup analyses by ethnicity (Asian and Caucasian), allergic disease classification (asthma, rhinitis, and both) and HWE (in and not) were performed, we did not find any statistically significant associations of C-108T polymorphism with allergic diseases risk (Table 2). No any publication and other small study related biases were observed in overall and subgroup analyses (Table 2).

Table 3 showed the summary ORs for the association between *FcεRIβ* E237G variant and allergic diseases risk. Overall, we observed *FcεRIβ* 237G allele was associated with increased risk of allergic diseases in total population (OR = 1.178, 95% CI: 1.022–1.357 for G vs. E and OR = 1.207, 95% CI: 1.031–1.411 for GG+EG vs. EE, respectively) (Table 3 and Figure 1). When restricted the analysis to the studies with control groups' genotype frequency distribution were met with HWE, we observed an elevated risk of allergic diseases among subjects carrying EG or GG genotypes, in comparison with EE genotype carriers (OR = 1.225, 95% CI: 1.041–1.442) (Table 3 and Figure 1). When stratified analyses were conducted by ethnicity, we found an increased risk of allergic diseases in subjects carrying EG or GG

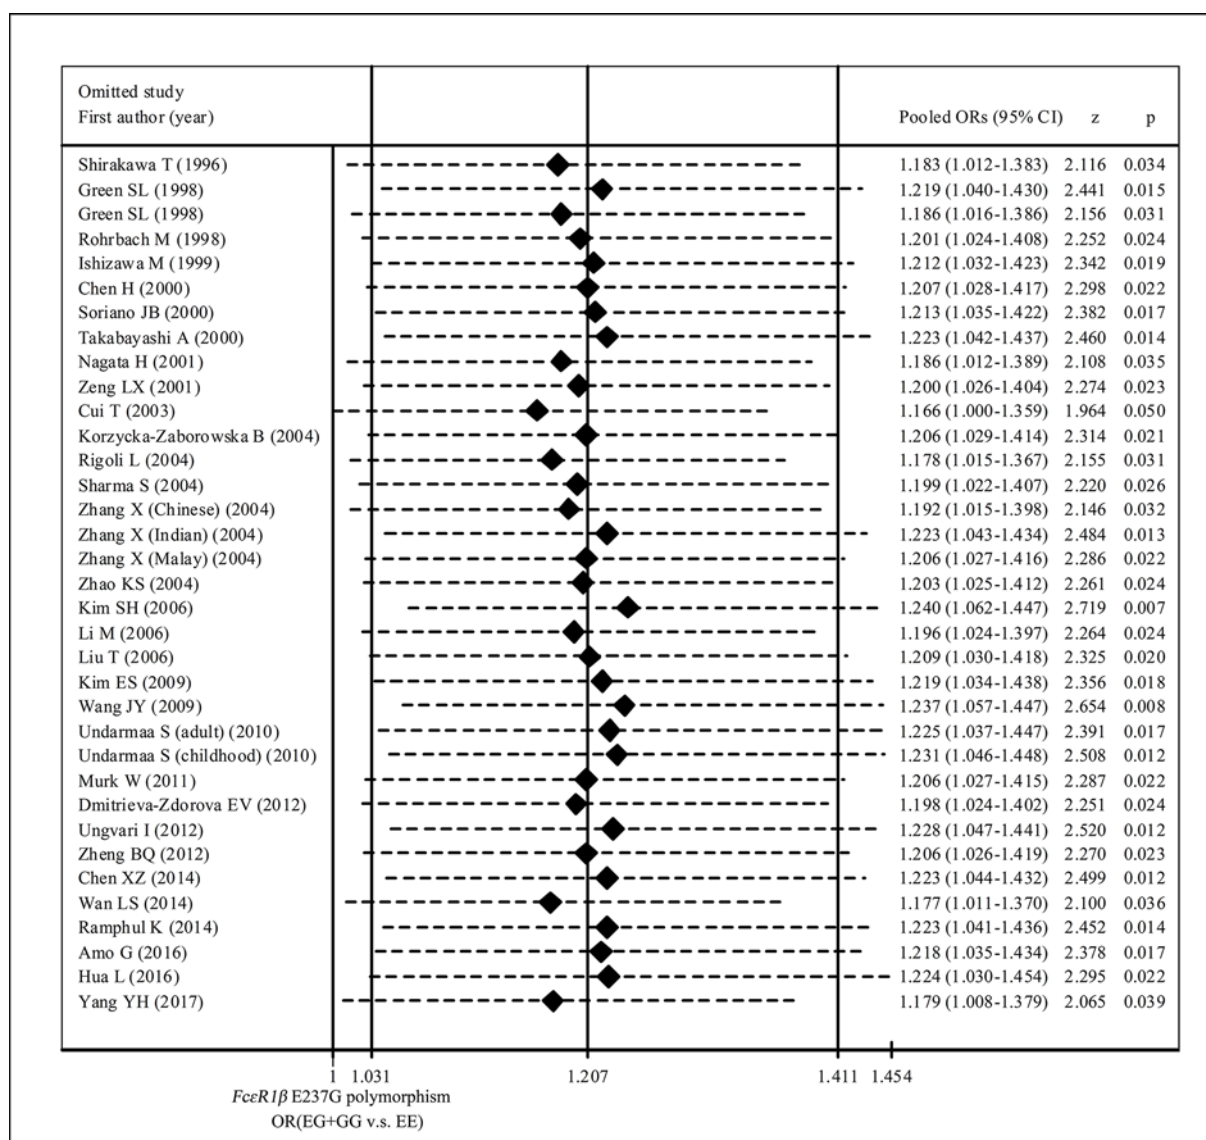

Figure 5. Sensitivity analysis for the association between *FcεRIβ* E237G polymorphism and allergic diseases risk

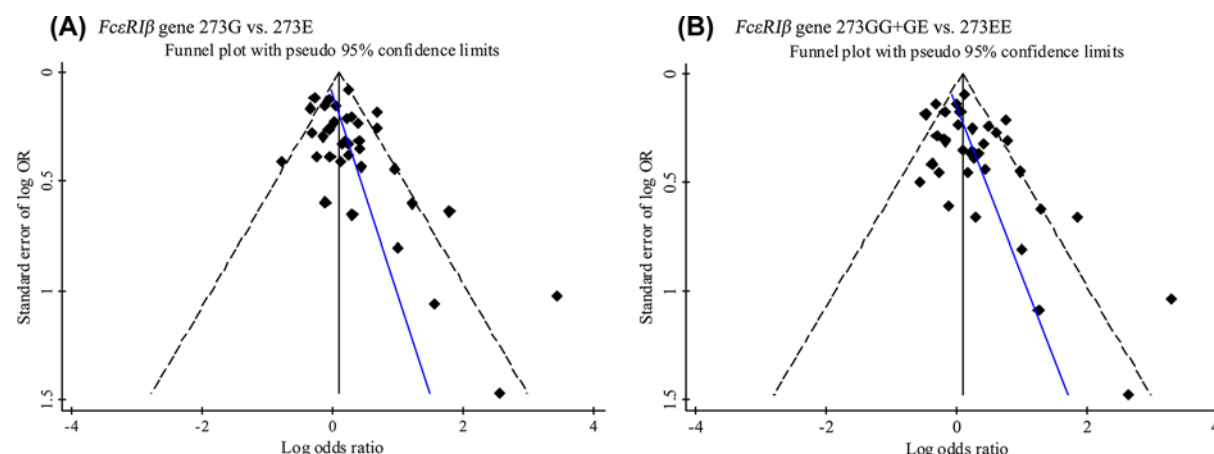

Figure 6. Egger's funnel plots for the association between *FcεRIβ* E237G polymorphism and allergic diseases risk  
(A) G allele vs. E allele; (B) EG/GG genotypes vs. EE genotype.

**Table 3 Summary ORs for the association between *FcεRIβ* E273G polymorphism and allergic diseases risk**

| Comparisons                                 | Sample size | Number of studies | Hypothesis tests     |      |       | Heterogeneity tests |        |                    | Publication bias test ( <i>P</i> ) |              |
|---------------------------------------------|-------------|-------------------|----------------------|------|-------|---------------------|--------|--------------------|------------------------------------|--------------|
|                                             |             |                   | OR (95% CI)          | Z    | P     | χ <sup>2</sup> (df) | P      | I <sup>2</sup> (%) | Begg's test                        | Egger's test |
| Overall                                     |             |                   |                      |      |       |                     |        |                    |                                    |              |
| G vs. E                                     | 14552/14956 | 35                | 1.178 (1.022–1.357)  | 2.25 | 0.024 | 84.83 (34)          | <0.001 | 59.9               | 0.028                              | 0.025        |
| GG+GE vs. EE                                | 7276/7478   | 35                | 1.207 (1.031–1.411)  | 2.35 | 0.019 | 82.95 (34)          | <0.001 | 59.0               | 0.024                              | 0.008        |
| Stratification by ethnicity                 |             |                   |                      |      |       |                     |        |                    |                                    |              |
| Asians                                      |             |                   |                      |      |       |                     |        |                    |                                    |              |
| G vs. E                                     | 10694/10080 | 25                | 1.158 (0.994–1.350)  | 1.88 | 0.060 | 65.83 (24)          | <0.001 | 63.5               | 0.176                              | 0.122        |
| GG+GE vs. EE                                | 5347/5040   | 25                | 1.189 (1.001–1.412)  | 1.98 | 0.048 | 64.41 (24)          | <0.001 | 62.7               | 0.148                              | 0.046        |
| Caucasians                                  |             |                   |                      |      |       |                     |        |                    |                                    |              |
| G vs. E                                     | 3576/3820   | 8                 | 1.544 (0.884–2.697)  | 1.53 | 0.126 | 19.63 (7)           | 0.006  | 64.3               | 0.026                              | 0.028        |
| GG+GE vs. EE                                | 1788/1910   | 8                 | 1.547 (0.895–2.673)  | 1.56 | 0.118 | 18.02 (7)           | 0.012  | 61.1               | 0.026                              | 0.028        |
| Stratification by atopic disease categories |             |                   |                      |      |       |                     |        |                    |                                    |              |
| Asthma                                      |             |                   |                      |      |       |                     |        |                    |                                    |              |
| G vs. E                                     | 12660/13324 | 31                | 1.148 (0.994–1.326)  | 1.88 | 0.060 | 72.22 (30)          | <0.001 | 58.5               | 0.051                              | 0.081        |
| GG+GE vs. EE                                | 6330/6662   | 31                | 1.164 (0.994–1.364)  | 1.89 | 0.059 | 69.11 (30)          | <0.001 | 56.6               | 0.047                              | 0.031        |
| Allergic rhinitis                           |             |                   |                      |      |       |                     |        |                    |                                    |              |
| G vs. E                                     | 764/1252    | 2                 | 0.680 (0.124–3.737)  | 0.44 | 0.657 | 7.30 (1)            | 0.007  | 86.3               | 0.317                              | -            |
| GG+GE vs. EE                                | 382/626     | 2                 | 0.740 (0.103–5.324)  | 0.30 | 0.765 | 9.20 (1)            | 0.002  | 89.1               | 0.317                              | -            |
| Asthma and/or allergic rhinitis             |             |                   |                      |      |       |                     |        |                    |                                    |              |
| G vs. E                                     | 1128/1432   | 3                 | 2.955 (0.616–14.181) | 1.35 | 0.176 | 10.60 (2)           | 0.005  | 81.1               | 0.117                              | 0.449        |
| GG+GE vs. EE                                | 564/716     | 3                 | 2.796 (0.646–12.109) | 1.37 | 0.169 | 9.01 (2)            | 0.011  | 77.8               | 0.117                              | 0.451        |
| Stratification by HWE                       |             |                   |                      |      |       |                     |        |                    |                                    |              |
| Yes                                         |             |                   |                      |      |       |                     |        |                    |                                    |              |
| G vs. E                                     | 13122/13122 | 32                | 1.211 (1.046–1.403)  | 2.55 | 0.011 | 76.29 (31)          | <0.001 | 59.4               | 0.009                              | 0.008        |
| GG+GE vs. EE                                | 6561/6561   | 32                | 1.225 (1.041–1.442)  | 2.44 | 0.015 | 75.76 (31)          | <0.001 | 59.1               | 0.011                              | 0.004        |

Abbreviation: df, degree of freedom.

genotypes, compared with EE genotype carries in Asians (OR = 1.189, 95% CI: 1.001–1.412) (Table 3 and Figure 2). No significant association of E237G polymorphism with allergic diseases risk was observed in Caucasians (OR = 1.544, 95% CI: 0.884–2.697 for G allele vs. E allele and OR = 1.547, 95% CI: 0.895–2.673 for EG+GG vs. EE, respectively) (Table 3 and Figure 2). In subgroup analyses by allergic diseases classification (asthma, allergic rhinitis, and both), we did not observe significant association of E237G with any allergic diseases categories (Table 3 and Figure 3).

We also performed a cumulative meta-analysis which accumulated the evidence about association of E237G variant with allergic diseases risk in the order of publication year of individual study. We observed that the association of EG/GG genotypes with increased allergic diseases started to become significant for the first time when Zeng *et al.*'s [28] study published in the year of 2001 (OR = 1.374, 95% CI: 1.013–1.864) and the summary OR became very similar to the OR estimated in this report (OR = 1.207) when Wang *et al.*'s [39] study published in the year of 2009 (OR = 1.299, 95% CI: 1.026–1.644) (Figure 4). The overall tendency of summary OR variation seemed alarming at the top of forest plot of the cumulative meta-analysis. It should be noted that Shirakawa *et al.* [2] (study 1) reported the first positive association of 237EG+GG with asthma risk with OR being equal to 2.693 in a Japanese (Asian) population and the second included study [3] with two independent case-control studies [one in black (study 2) and one in white (study 3)] reported different associations, one is negative association of 237EG+GG with asthma risk in Black (OR = 0.763) and the other is similar to Shirakawa *et al.*'s result in White population (OR = 3.693). When merging the result of study 1 with study 2, the overall OR significantly decreased. And when summarizing the results of the first three studies (*i.e.* study 1, 2, and 3) the overall OR looked bigger than the second. As a result, the overall ORs would generate a V-form change in the forest plot of cumulative meta-analysis. The alarming changes in the plot of

cumulative meta-analysis also indicated that there was high heterogeneity of the results of the included individual studies.

Sensitivity analysis was performed by sequentially omitting each individual study in the order of publication year and the pooled ORs were estimated repeatedly, which was used to evaluate the stability of the results of present meta-analysis. The sensitivity analysis showed that the association of EG and GG genotypes with increased risk of allergic diseases maintained statistically significant when removing any each individual study (Figure 5). Egger's regression test and Begg's rank correlation test were used to evaluate the small-study effects and potential publication bias in current meta-analysis. Both tests indicated that the significant association of G allele or EG+GG genotypes with elevated risk of allergic diseases might strongly influenced by small-study effect or publication bias (Table 3). The Egger's funnel plots for the association between E237G polymorphism and allergic diseases risk also showed that the OR distributions for both G allele vs. E allele (Figure 6A) and EG+GG vs. EE (Figure 6B) were obviously asymmetrical.

There are some inherent limitations of meta-analysis which should be taken into consideration when using the results of this comment. First, there was high heterogeneity in this meta-analysis, especially in the case of association of E237G variant with allergic diseases risk. Although, subgroup analyses were performed on the basis of ethnicity, allergic disease category and HWE, heterogeneity among the included studies still be statistically significant in all subgroups. Second, publication bias tests indicated that the probable existence of publication bias, i.e. some unpublished negative results studies thus could not be included in this analyses might result in an over-estimated association of E237G with allergic disease risk.

In conclusion, the results of Guo et al.'s study [1] should be interpreted with caution. To make an asserted conclusion, well-designed studies with large number of homogeneous population are required. We do hope that this comment will be helpful to clarify the results presented by Guo et al. [1].

## Competing Interests

The authors declare that there are no competing interests associated with the manuscript.

## Funding

This work was supported by the Key Program of Science and Technology Research Project from the Department of Education of Hubei Province [grant number D20192001].

## Author Contribution

H.Y.: designed the study, performed the statistical analysis and edited the manuscript. L.Z.: conducted literature search and extracted data from individual studies. Y.Z. and M.Y.: prepared and reviewed the manuscript. S.W.: conducted literature search and data checking. All authors approved the final manuscript.

## Abbreviations

CI, confidence interval; FcεRIβ, high-affinity IgE receptor β chain; HWE, Hardy-Weinberg equilibrium; OR, odds ratio.

## References

- Guo, H., Peng, T., Luo, P., Li, H., Huang, S., Li, S. et al. (2018) Association of FcεpsilonRIβ polymorphisms with risk of asthma and allergic rhinitis: evidence based on 29 case-control studies. *Biosci. Rep.* **38**, 1–16, <https://doi.org/10.1042/BSR20180177>
- Shirakawa, T., Mao, X.Q., Sasaki, S., Enomoto, T., Kawai, M., Morimoto, K. et al. (1996) Association between atopic asthma and a coding variant of Fc epsilon RI beta in a Japanese population. *Hum. Mol. Genet.* **5**, 1129–1130, <https://doi.org/10.1093/hmg/5.8.1129>
- Green, S.L., Gaillard, M.C., Song, E., Dewar, J.B. and Halkas, A. (1998) Polymorphisms of the beta chain of the high-affinity immunoglobulin E receptor (Fcεpsilon RI-β) in South African black and white asthmatic and nonasthmatic individuals. *Am. J. Respir. Crit. Care Med.* **158**, 1487–1492, <https://doi.org/10.1164/ajrcm.158.5.9707099>
- Rohrbach, M., Kraemer, R. and Liechti-Gallati, S. (1998) Screening of the Fc epsilon RI-beta-gene in a Swiss population of asthmatic children: no association with E237G and identification of new sequence variations. *Dis. Markers* **14**, 177–186, <https://doi.org/10.1155/1998/940356>
- Dickson, P.W., Wong, Z.Y., Harrap, S.B., Abramson, M.J. and Walters, E.H. (1999) Mutational analysis of the high affinity immunoglobulin E receptor beta subunit gene in asthma. *Thorax* **54**, 409–412, <https://doi.org/10.1136/thx.54.5.409>
- Ishizawa, M., Shibasaki, M., Yokouchi, Y., Noguchi, E., Arinami, T., Yamakawa-Kobayashi, K. et al. (1999) No association between atopic asthma and a coding variant of Fc epsilon RI beta in a Japanese population. *J. Hum. Genet.* **44**, 308–311, <https://doi.org/10.1007/s100380050166>
- Sharma, S., Nagarkatti, R., B-Rao, C., Niphadkar, P.V., Vijayan, V., Sharma, S.K. et al. (2004) A-16\_C haplotype in the FcεpsilonRIβ gene confers a higher risk for atopic asthma in the Indian population. *Clin. Genet.* **66**, 417–425, <https://doi.org/10.1111/j.1399-0004.2004.00333.x>

- 8 Kim, S.H., Bae, J.S., Holloway, J.W., Lee, J.T., Suh, C.H., Nahm, D.H. et al. (2006) A polymorphism of MS4A2 (- 109T >C) encoding the beta-chain of the high-affinity immunoglobulin E receptor (FcεRIβ) is associated with a susceptibility to aspirin-intolerant asthma. *Clin. Exp. Allergy* **36**, 877–883
- 9 Li, M., Du, Q., Li, L., Song, L. and Li, B. (2006) Gene mutation of high affinity immunoglobulin E receptor beta-chain in children with asthma. *Zhongguo Dang Dai Er Ke Za Zhi* **8**, 453–456
- 10 Undarmaa, S., Mashimo, Y., Hattori, S., Shimojo, N., Fujita, K., Miyatake, A. et al. (2010) Replication of genetic association studies in asthma and related phenotypes. *J. Hum. Genet.* **55**, 342–349, <https://doi.org/10.1038/jhg.2010.32>
- 11 Murk, W., Walsh, K., Hsu, L.I., Zhao, L., Bracken, M.B. and Dewan, A.T. (2011) Attempted replication of 50 reported asthma risk genes identifies a SNP in RAD50 as associated with childhood atopic asthma. *Hum. Hered.* **71**, 97–105, <https://doi.org/10.1159/000319536>
- 12 Ungvari, I., Hullam, G., Antal, P., Kiszal, P.S., Gezsi, A., Hadadi, E. et al. (2012) Evaluation of a partial genome screening of two asthma susceptibility regions using bayesian network based bayesian multilevel analysis of relevance. *PLoS ONE* **7**, e33573, <https://doi.org/10.1371/journal.pone.0033573>
- 13 Chen, X.Z. (2014) Value of asthma-susceptibility genes non-invasive detection in early diagnosis of children with asthma. *Shi Yong Lin Chuan Yi Yao Za Zhi* **18**, 94–96
- 14 Wan, L.S., Wen, P.Q., Li, J.X., Ma, D.L., Cui, D. and Wang, S. (2014) The highaffinity receptor for Immunoglobulin E MS4A2 gene single-nucleotide polymorphism analysis of qi deficiency asthma patients. *Zhongguo You Sheng Yu Yi Chuan Za Zhi* **22**, 21–22
- 15 Yang, Y.H., Li, Y. and Lu, Y.Q. (2017) Association of ADRB2 and MS4A2 gene polymorphisms with asthma. *Zhongguo Fu You Bao Jian* **32**, 1254–1255
- 16 Cui, T.P., Jiang, W.C., Wang, L., Xie, J.G. and Wu, J.M. (2004) Association analysis of FcεRI-β gene with allergic asthma in Chinese. *Zhongguo Bing Li Sheng Li Za Zhi* **20**, 2049–2052
- 17 Cui, T., Wang, L., Wu, J. and Xie, J. (2003) The association analysis of FcεRIβ with allergic asthma in a Chinese population. *Chin. Med. J. (Engl.)* **116**, 1875–1878
- 18 Hua, L., Dong, X.Y., Liu, Q.H., Lv, J. and Bao, Y.X. (2009) Single-nucleotide polymorphisms in genes predisposing to asthma in children of Chinese Han nationality. *J. Investig. Allergol. Clin. Immunol.* **19**, 391–395, <http://www.jiaci.org/summary/vol19-issue5-num515>
- 19 Hua, L., Zuo, X.B., Bao, Y.X., Liu, Q.H., Li, J.Y., Lv, J. et al. (2016) Four-locus gene interaction between IL13, IL4, FCER1B, and ADRB2 for asthma in Chinese Han children. *Pediatr. Pulmonol.* **51**, 364–371, <https://doi.org/10.1002/ppul.23322>
- 20 Ramphul, K., Lv, J., Hua, L., Liu, Q.H., Fang, D.Z., Ji, R.X. et al. (2014) Single nucleotide polymorphisms predisposing to asthma in children of Mauritian Indian and Chinese Han ethnicity. *Braz. J. Med. Biol. Res.* **47**, 394–397, <https://doi.org/10.1590/1414-431X20143751>
- 21 Laprise, C., Boulet, L.P., Morissette, J., Winstall, E. and Raymond, V. (2000) Evidence for association and linkage between atopy, airway hyper-responsiveness, and the beta subunit Glu237Gly variant of the high-affinity receptor for immunoglobulin E in the French-Canadian population. *Immunogenetics* **51**, 695–702, <https://doi.org/10.1007/s002510000185>
- 22 Sharma, S. and Ghosh, B. (2009) Promoter polymorphism in the MS4A2 gene and asthma in the Indian population. *Int. Arch. Allergy Immunol.* **149**, 208–218, <https://doi.org/10.1159/000199716>
- 23 Amo, G., Garcia-Menaya, J., Campo, P., Cordobés, C., Plaza Serón, M.C., Ayuso, P. et al. (2016) A nonsynonymous FCER1B SNP is associated with risk of developing allergic rhinitis and with IgE levels. *Sci. Rep.* **6**, 19724, <https://doi.org/10.1038/srep19724>
- 24 Chen, H., Chen, Y. and Hu, L. (2000) Study on the FcεRIβ polymorphism and susceptibility of asthma in a Chinese population. *Zhonghua Yi Xue Za Zhi* **80**, 664–667
- 25 Soriano, J.B., de Cid, R., Estivill, X., Anto, J.M., Sunyer, J., Otero, D. et al. (2000) Association study of proposed candidate genes/regions in a population of Spanish asthmatics. *Eur. J. Epidemiol.* **16**, 745–750, <https://doi.org/10.1023/A:1026758319621>
- 26 Takabayashi, A., Ihara, K., Sasaki, Y., Suzuki, Y., Nishima, S., Izuhara, K. et al. (2000) Childhood atopic asthma: positive association with a polymorphism of IL-4 receptor alpha gene but not with that of IL-4 promoter or Fc epsilon receptor I beta gene. *Exp. Clin. Immunogenet.* **17**, 63–70, <https://doi.org/10.1159/000019125>
- 27 Nagata, H., Mutoh, H., Kumahara, K., Arimoto, Y., Tomemori, T., Sakurai, D. et al. (2001) Association between nasal allergy and a coding variant of the Fc epsilon RI beta gene Glu237Gly in a Japanese population. *Hum. Genet.* **109**, 262–266, <https://doi.org/10.1007/s004390100561>
- 28 Zeng, L.X., Zhou, S.J., Kuang, J.L. and Rao, W.H. (2001) Study of mutation of β chain gene E237G, a high affinity receptor of IgE in asthmatics. *Jiangxi Xi Yue Xue Bao* **41**, 43–45
- 29 Gan, X., Kuang, J.L., Zou, X.Q. and Rao, W.H. (2004) Study on the relationship between IgE high affinity receptor beta chain gene polymorphism and serum total IgE in patients with bronchial asthma. *Zhonghua Jie He He Hu Xi Za Zhi* **27**, 704–705
- 30 Korzycka-Zaborowska, B., Hopkin, J.M. and Gorski, P. (2004) Genetic variants of FcεRIβ and IL-4 and atopy in a Polish population. *Allergol. Immunopathol. (Madr.)* **32**, 53–58
- 31 Rigoli, L., Di Bella, C., Procopio, V., Barberio, G., Barberi, I., Caminiti, L. et al. (2004) Molecular analysis of sequence variants in the FcεRI receptor I beta gene and IL-4 gene promoter in Italian atopic families. *Allergy* **59**, 213–218, <https://doi.org/10.1046/j.1398-9995.2003.00385.x>
- 32 Zhang, X., Zhang, W., Qiu, D., Sandford, A. and Tan, W.C. (2004) The E237G polymorphism of the high-affinity IgE receptor beta chain and asthma. *Ann. Allergy. Asthma. Immunol.* **93**, 499–503
- 33 Zhao, K.S., Chen, H.J., Qiao, H.M., Zhao, F.X., Sun, M.Y. and Fu, W.Y. (2004) Analysis of gene mutation for high affinity immunoglobulin E receptor chain in asthmatic children. *Lin Chuang Er Ke Za Zhi* **22**, 794–797
- 34 Zhao, K.S., Lu, J.R., Wang, Z.H., Guo, Y., Yu, L.Y. and Fu, W.Y. (2004) Association between FcεRI-β gene promoter polymorphism and total serum IgE levels of asthma in children. *Zhongguo Shi Yong Er Ke Za Zhi* **19**, 744–746
- 35 Hizawa, N., Maeda, Y., Konno, S., Fukui, Y., Takahashi, D. and Nishimura, M. (2006) Genetic polymorphisms at FCER1B and PAI-1 and asthma susceptibility. *Clin. Exp. Allergy* **36**, 872–876, <https://doi.org/10.1111/j.1365-2222.2006.02413.x>
- 36 Liu, T., Teng, L., Guan, L.X., Wu, L.P. and Sun, K.Y. (2006) Study on the E237G polymorphism of the FcεRIβ gene with asthma. *Zhongguo Shi Yong Nei Ke Za Zhi* **26**, 1520–1522

- 37 Potaczek, D.P., Sanak, M. and Szczeklik, A. (2007) Additive association between FCER1A and FCER1B genetic polymorphisms and total serum IgE levels. *Allergy* **62**, 1095–1096, <https://doi.org/10.1111/j.1398-9995.2007.01446.x>
- 38 Kim, E.S., Kim, S.H., Kim, K.W., Park, H.S., Shin, E.S., Lee, J.E. et al. (2009) Involvement of Fc(epsilon)R1beta gene polymorphisms in susceptibility to atopy in Korean children with asthma. *Eur. J. Pediatr.* **168**, 1483–1490, <https://doi.org/10.1007/s00431-009-0960-x>
- 39 Wang, J.Y., Liou, Y.H., Wu, Y.J., Hsiao, Y.H. and Wu, L.S. (2009) An association study of 13 SNPs from seven candidate genes with pediatric asthma and a preliminary study for genetic testing by multiple variants in Taiwanese population. *J. Clin. Immunol.* **29**, 205–209, <https://doi.org/10.1007/s10875-008-9256-6>
- 40 Tikhonova, V., Voitovich, A., Korostovsev, D. and Larionova, V. (2010) The -109C>T polymorphism of the FCER1B gene in children with asthma. *Pediatr. Res.* **68**, 413
- 41 Dmitrieva-Zdorova, E.V., Voronko, O.E., Latysheva, E.A., Storozhakov, G.I. and Archakov, A.I. (2012) Analysis of polymorphisms in T(H)2-associated genes in Russian patients with atopic bronchial asthma. *J. Investig. Allergol. Clin. Immunol.* **22**, 126–132, <http://www.jiaci.org/summary/vol22-issue2-num835>
- 42 Zheng, B.Q., Wang, G.L., Yang, S., Lu, Y.Q., Liu, R.J. and Li, Y. (2012) Study of genetic susceptibility in 198 children with asthma. *Zhongguo Dang Dai Er Ke Za Zhi* **14**, 811–814
